# Supplementary material
Source: MDPI journal article supplement (https://www.mdpi.com/2311-553X/10/1/2)
Supplement: s1 [file s1]

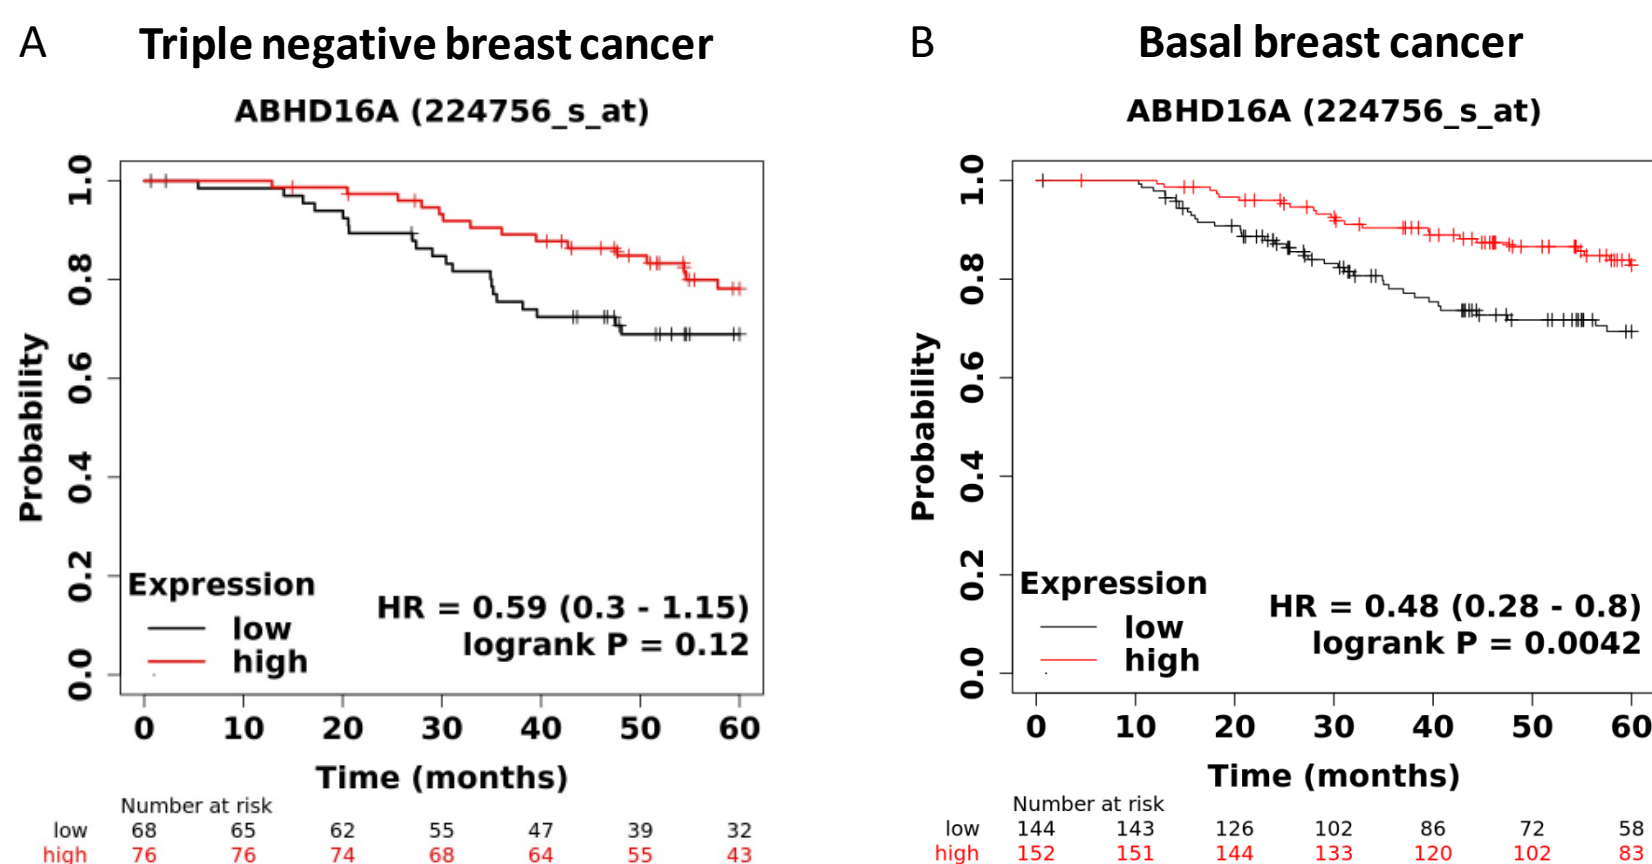

**Supplementary Figure S1. Kaplan Meier curve analysis of the miR-4646-5p host gene abhydrolase domain containing 16A (ABHD16A).** Overall survival of **(A)** patients with triple negative breast cancer split into an ABHD16A low (black; n = 68) and high (red; n = 76) expression group based on microarray data from the Gene Expression Omnibus (GEO) (log-rank test; p = 0.12; Hazard ratio = 0.59; 95% confidence interval 0.3 – 1.15) and **(B)** patients with basal breast cancer (PAM50 subtype classification) split into an ABHD16A low (black; n = 144) and high (red; n = 152) expression group based on GEO microarray data (log-rank test; p = 0.0042; Hazard ratio = 0.48; 95% confidence interval 0.28 – 0.8).

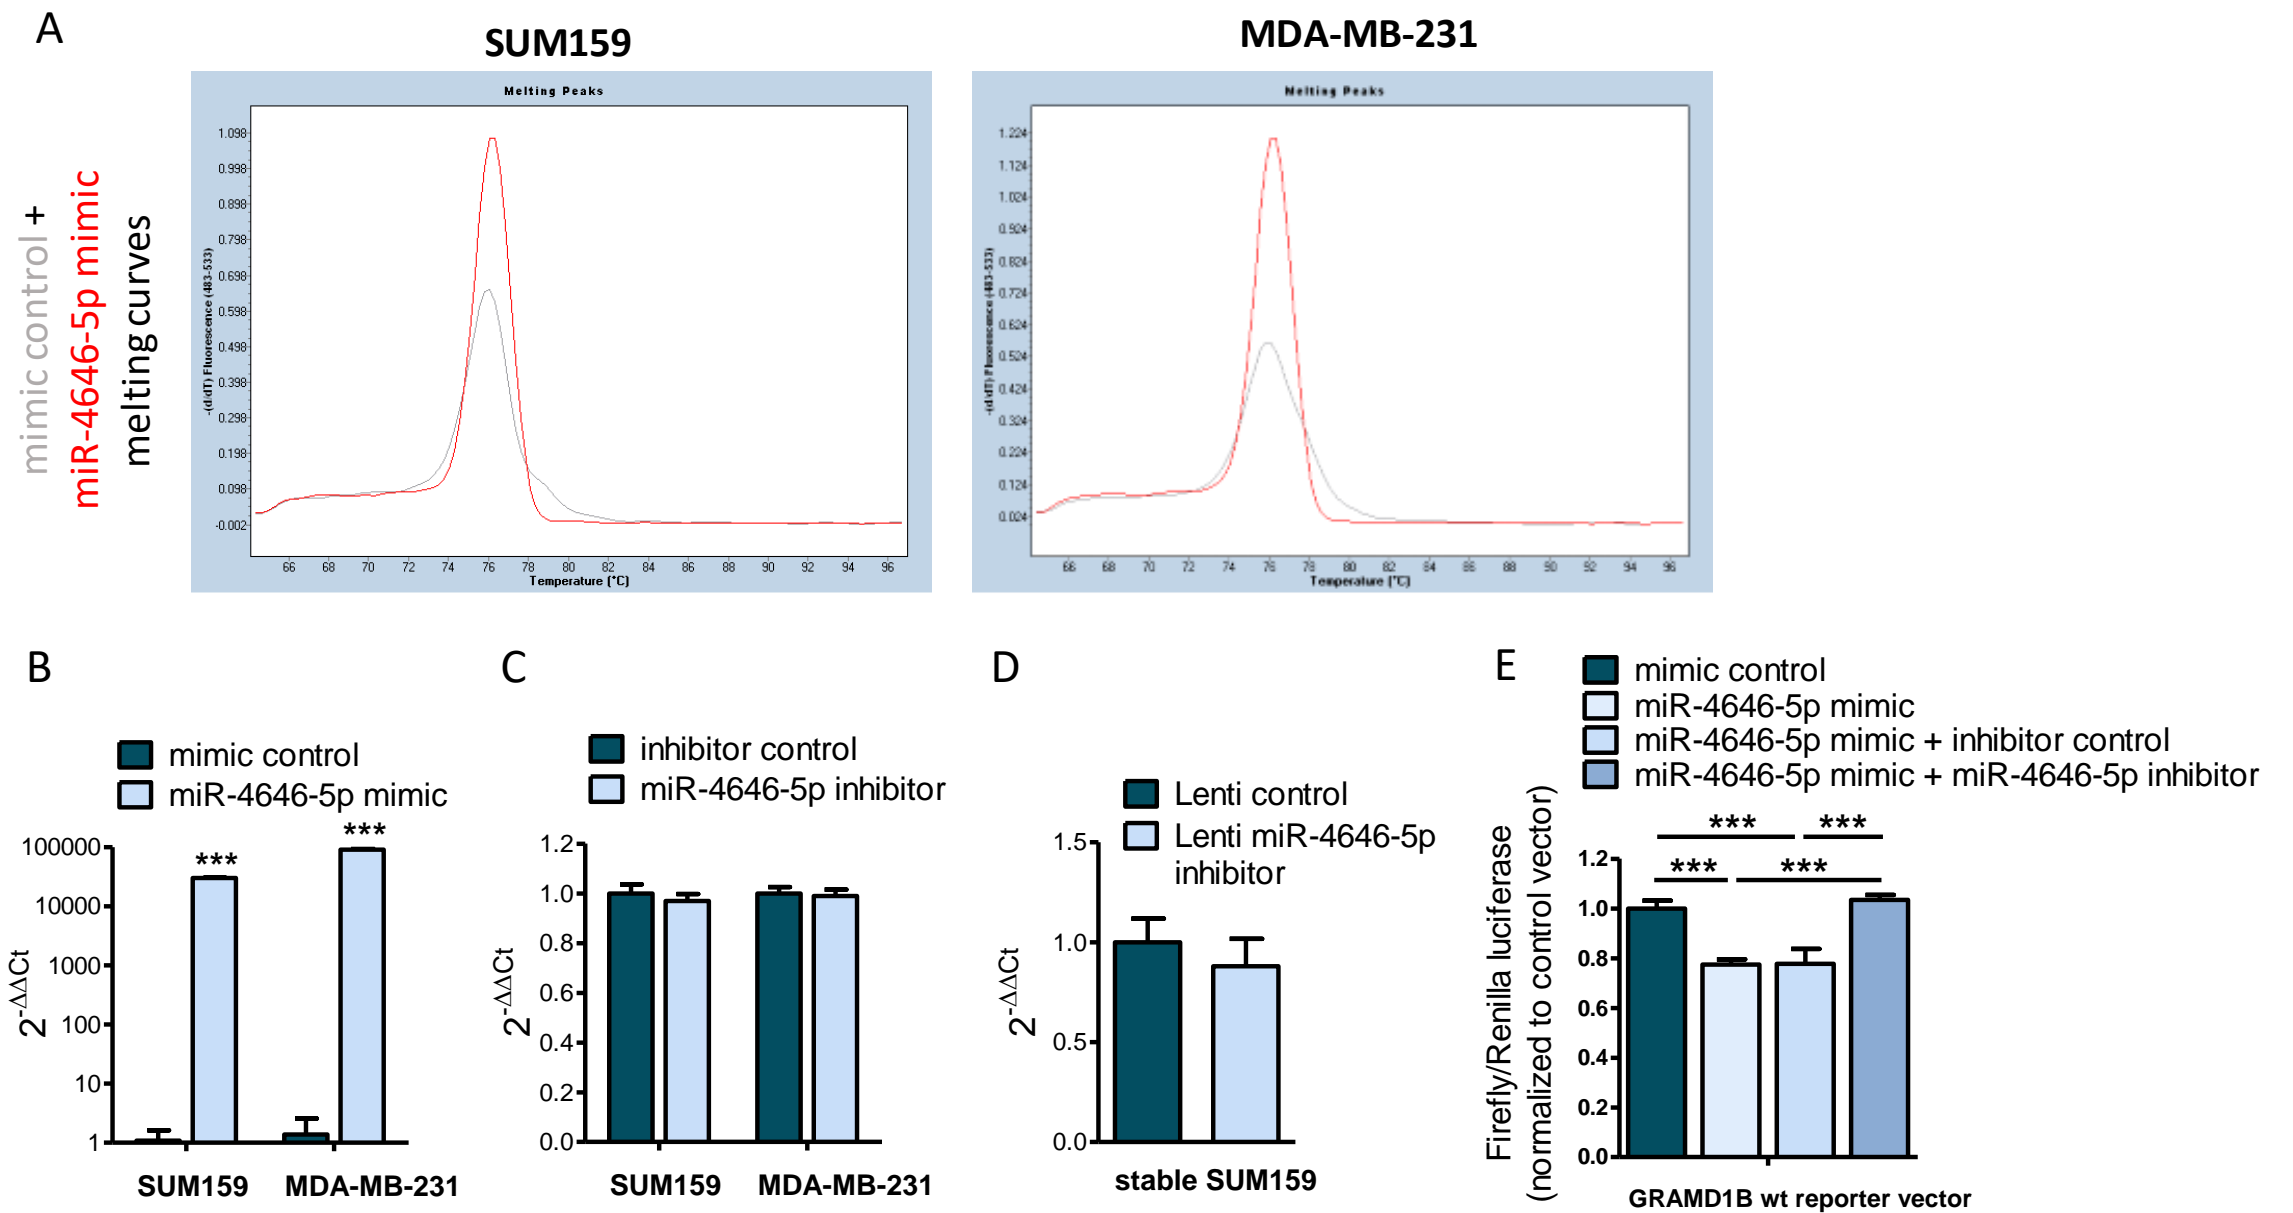

**Supplementary Figure S2. MiR-4646-5p overexpression and inhibition in triple negative breast cancer (TNBC) cell lines.** (A) Melting curve analysis of quantitative RT-PCR-based detection of miR-4646-5p in SUM159 and MDA-MB-231 cells transfected with miR-4646-5p mimic (red) or mimic control (gray) shows for the endogenous expression (control) a specific but weaker peak than for the overexpressed mimics (B) Transient overexpression of miR-4646-5p by mimic transfection (48 h) in two TNBC cell lines measured by RT-qPCR, depicted relative to the control (mean ± SD; n = 3; \*\*\*p ≤ 0.001). (C, D) Transient (48 h, left) and stable lentiviral (right) inhibition of miR-4646-5p in TNBC cell lines as determined by RT-qPCR, depicted relative to the respective controls (mean ± SD; n = 3). (E) Dual luciferase reporter assay using a reporter with a direct binding site of miR-4646-5p from the 3' UTR of the wildtype (wt) GRAM Domain-Containing Protein 1B gene (*GRAMD1B*). The reporter was co-transfected with miR-4646-5p mimic alone or in combination with the miR-4646-5p inhibitor or inhibitor control, showing that the specific inhibitor can bind and block the effect of the miRNA. The luciferase signals were normalized to the respective signals from an empty control vector (n = 3; mean ± SD; \*\*\*p ≤ 0.001).

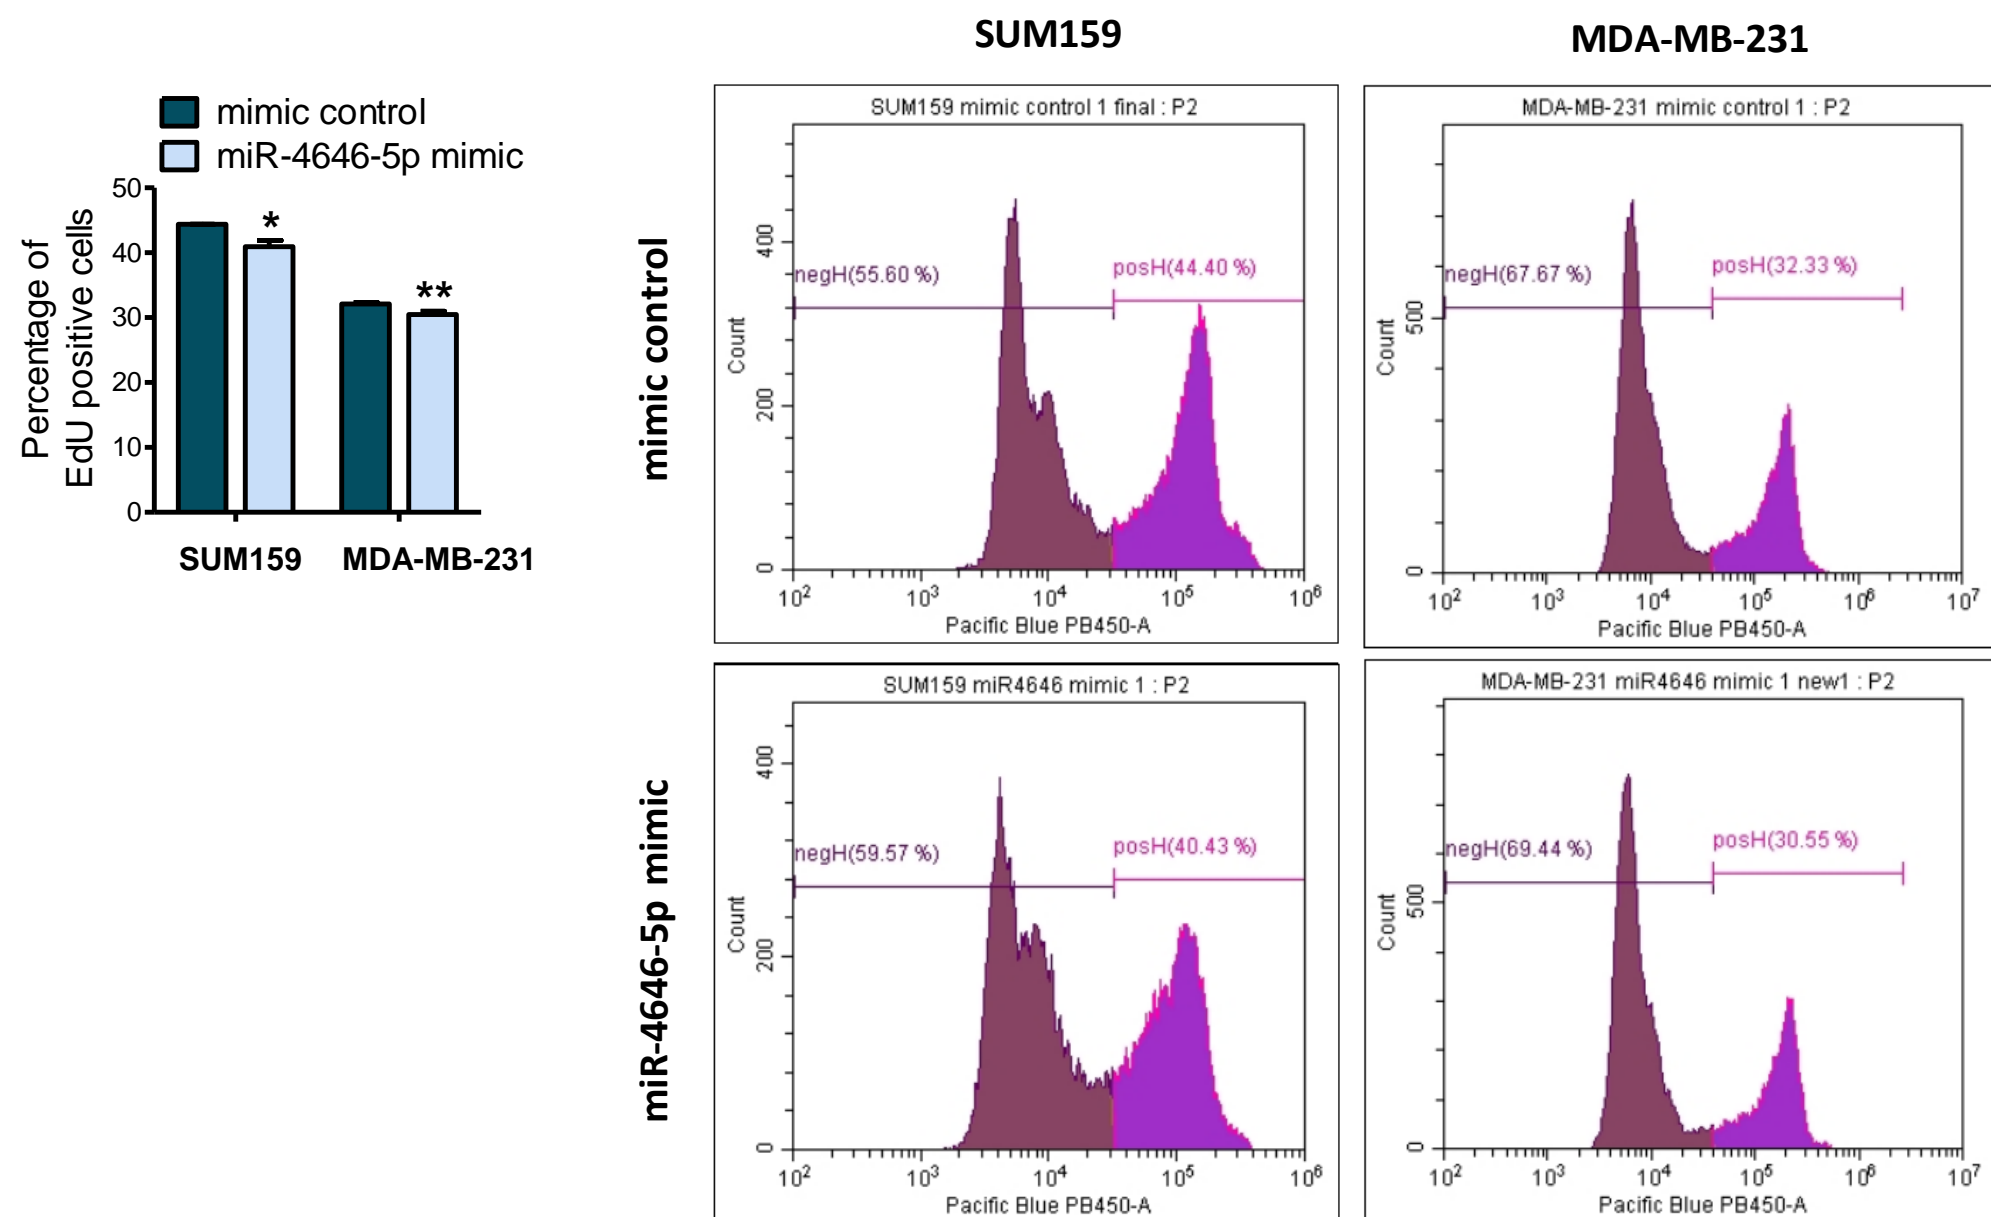

**Supplementary Figure S3. MiR-4646-5p overexpression reduces proliferation of TNBC cell lines.** Cell proliferation was assessed 72 h after transient miR-4646-5p mimic transfection by a flow cytometric EdU assay (n = 3; for SUM159 mimic control n = 2; mean ± SD; \*p ≤ 0.05, \*\*p ≤ 0.01). Representative histograms on the right show the distribution and gating of EdU negative and positive cells in the two TNBC cell lines.

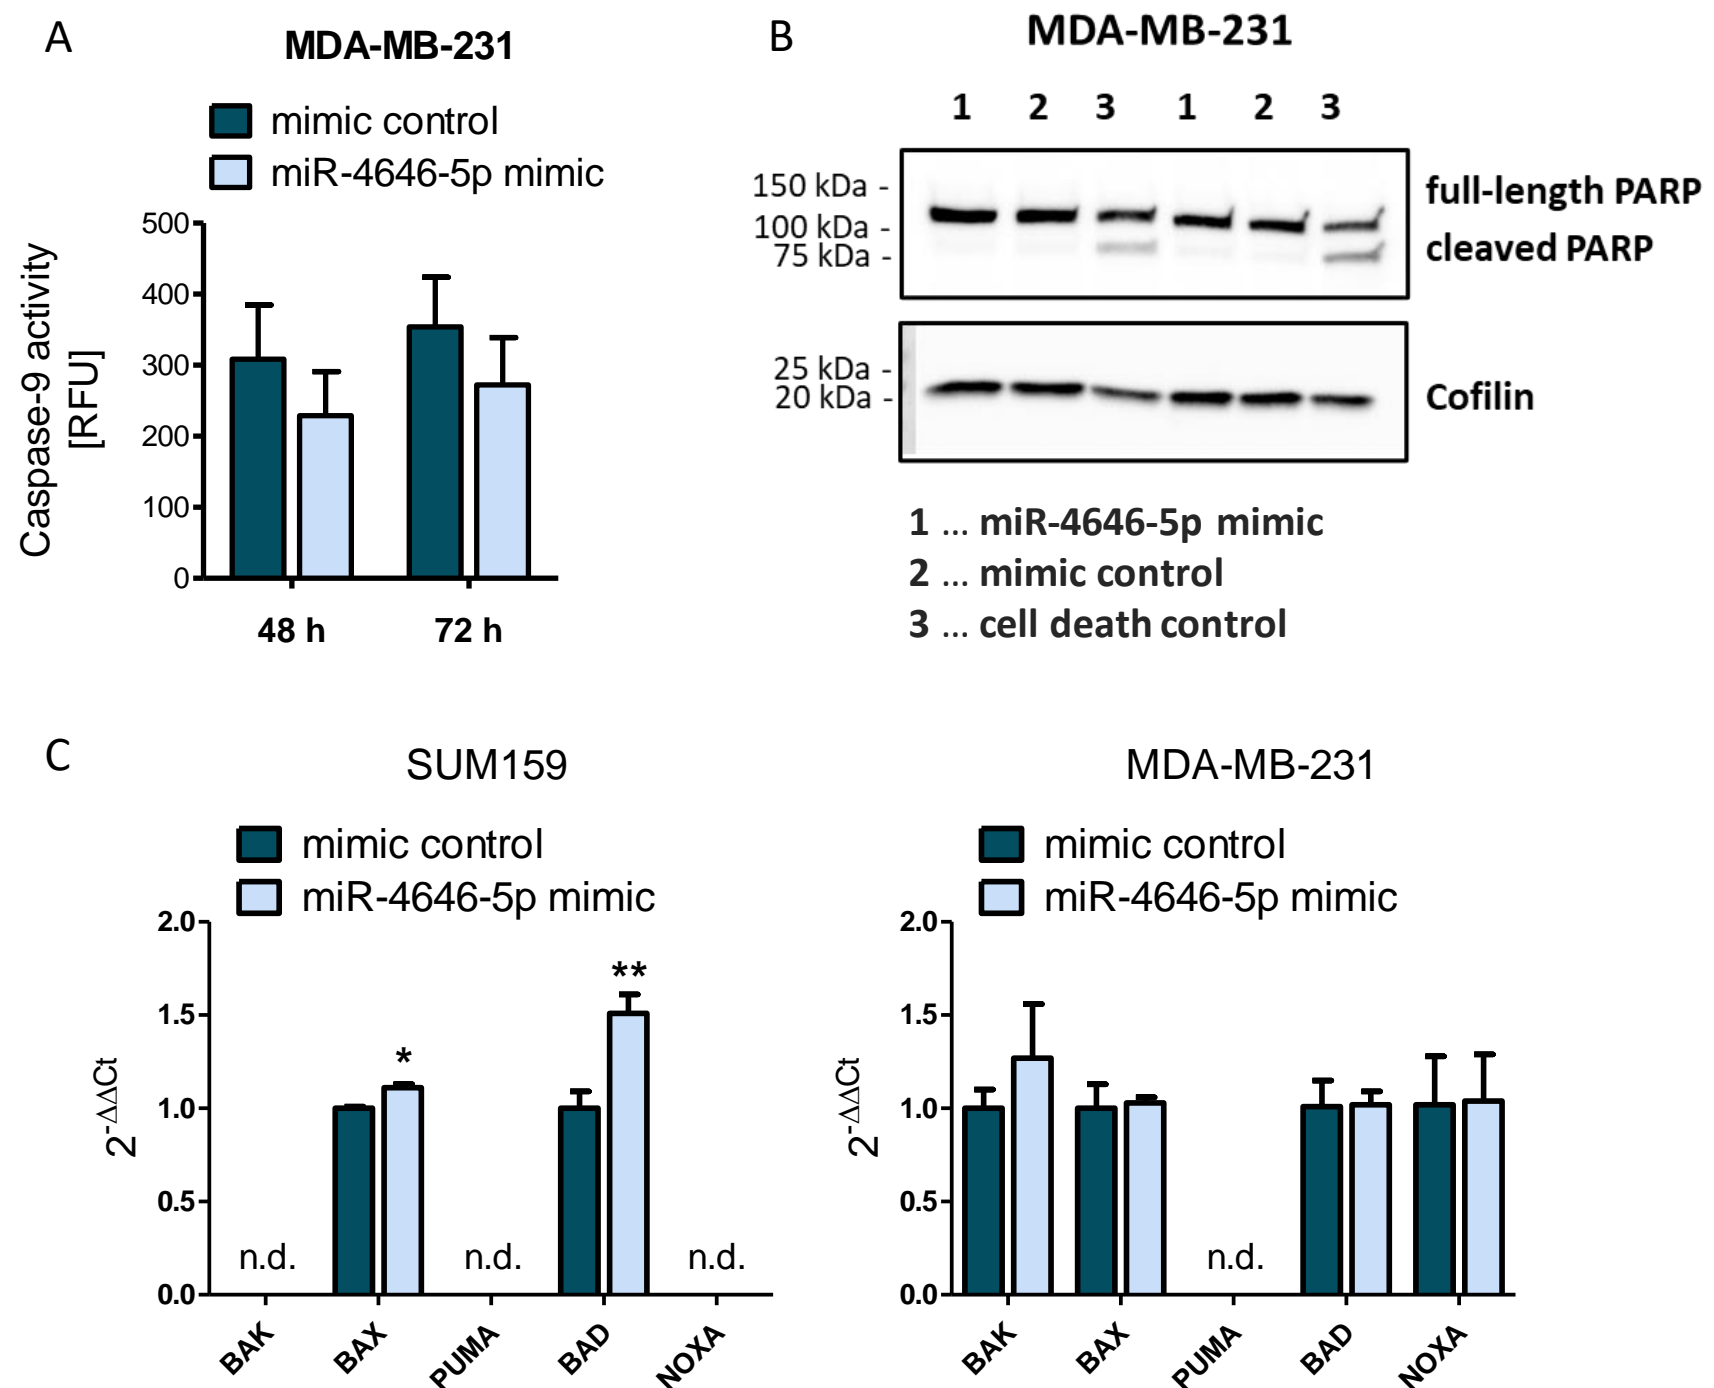

**Supplementary Figure S4. Effect of miR-4646-5p overexpression on caspase-9 activity, PARP cleavage, and the expression of pro-apoptotic genes. (A)** Luminescent caspase-9 activity assays were performed 48 h and 72 h after miR-4646-5p mimic or control transfection to investigate apoptosis induction in MDA-MB-231 cells (n = 6; mean ± SD; RFU = Relative fluorescence units). **(B)** The cleavage of PARP, a process indicative of apoptosis, was detected by Western blotting 48 h after transient miR-4646-5p mimic, negative mimic control, or positive cell death control transfection of MDA-MB-231 cells. **(C)** The expression of the pro-apoptotic genes BAK, BAX, PUMA, BAD, and NOXA was measured by qPCR 48 h after miR-4646-5p mimic or control transfection (n = 3; mean ± SD; \*p ≤ 0.05, \*\*p ≤ 0.01; n.d. = not detected). BAK...BCL2 homologous antagonist killer, BAX...BCL2 associated X, apoptosis regulator, PUMA...p53 upregulated modulator of apoptosis, BAD...BCL2 associated agonist of cell death, NOXA...phorbol-12-myristate-13-acetate-induced protein 1.

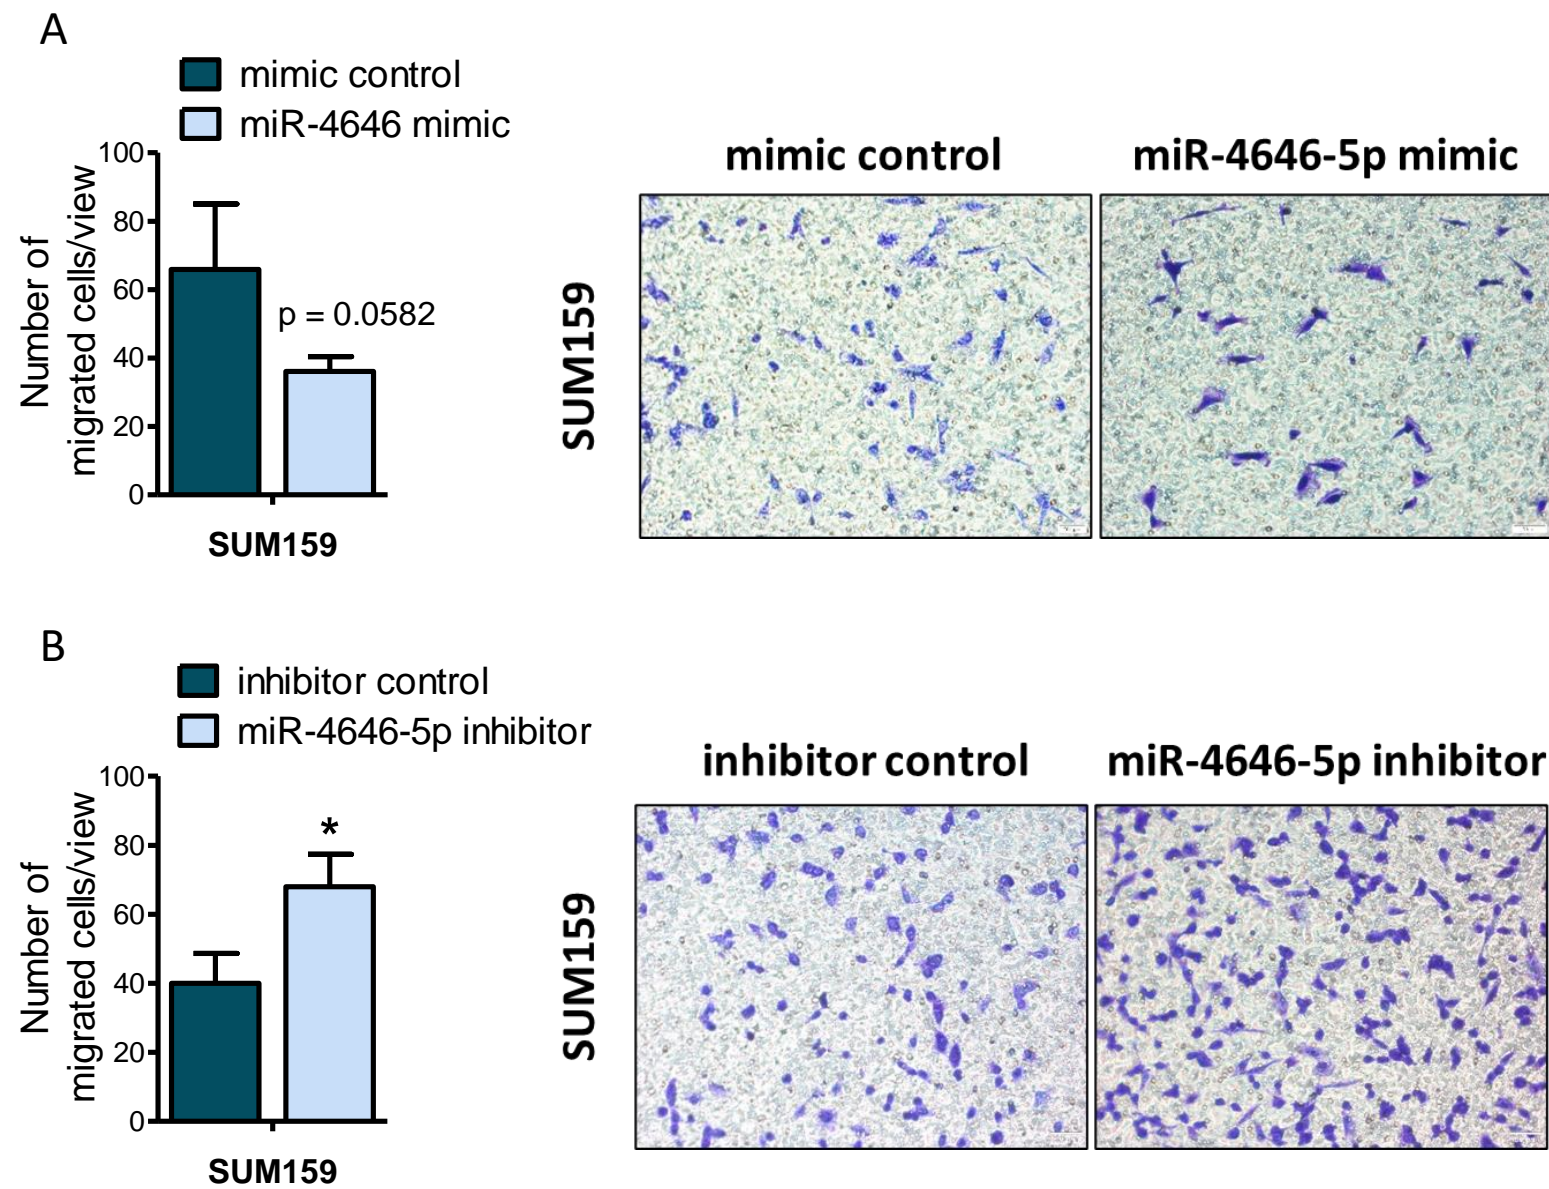

**Supplementary Figure S5. The effect of (A) transient miR-4646-5p mimic, and (B) transient inhibitor transfection on the migration of SUM159 cells was investigated in transwell assays. In each transwell, cells were counted in five representative fields of view with 40× magnification (representative images of 20× magnification are shown on the right) and are presented as mean  $\pm$  SD (n = 3; \*  $p \leq 0.05$ ).**



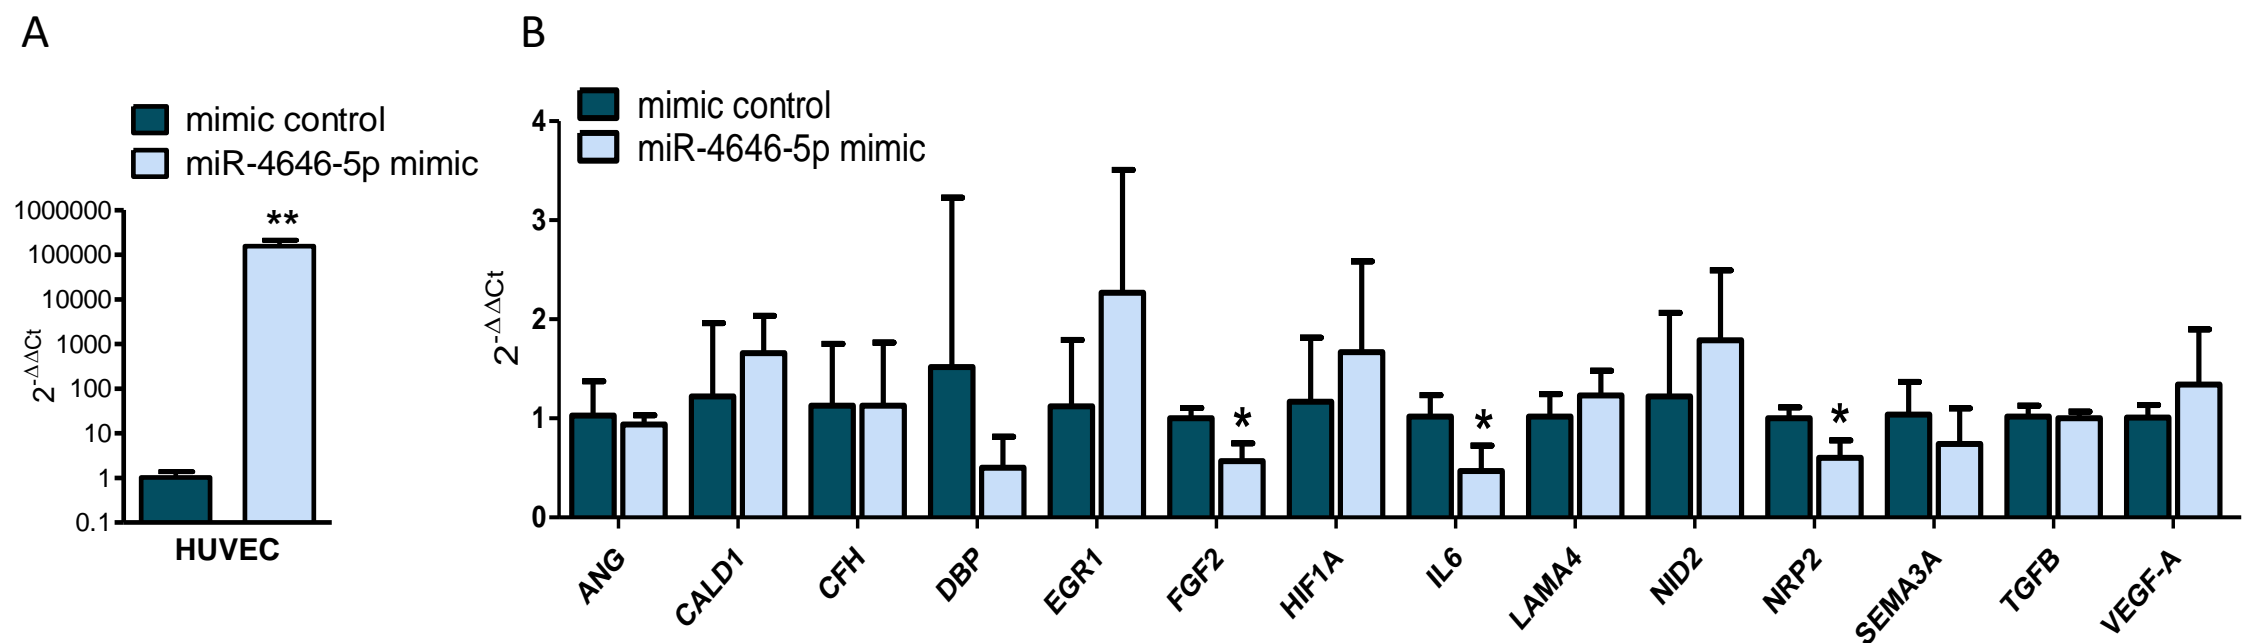

**Supplementary Figure S6. Expression of angiogenesis-related genes in human umbilical vein endothelial cells (HUVECs) upon miR-4646-5p mimic transfection.** (A) Transient overexpression of miR-4646-5p by mimic transfection (48 h) in human umbilical vein endothelial cells (HUVECs) measured by RT-qPCR, depicted relative to the control (mean  $\pm$  SD; n = 3; \*\*p  $\leq$  0.01). (B) Expression of angiogenesis-related genes was measured by RT-qPCR 48 h after miR-4646-5p mimic or control transfection (n = 3; mean  $\pm$  SD; \*p  $\leq$  0.05). ANG...angiogenin, CALD1...caldesmon, CFH...complement factor H, DBP...D-box binding PAR BZIP transcription factor, EGR1...early growth response 1, FGF2...fibroblast growth factor 2, HIF1A...hypoxia-inducible factor 1 subunit alpha, IL-6...interleukin 6, LAMA4...laminin subunit alpha 4, NID2...nidogen 2, NRP2...neuropilin 2, SEMA3A...semaphorin 3A, TGFB...transforming growth factor beta, VEGF-A...vascular endothelial growth factor A.

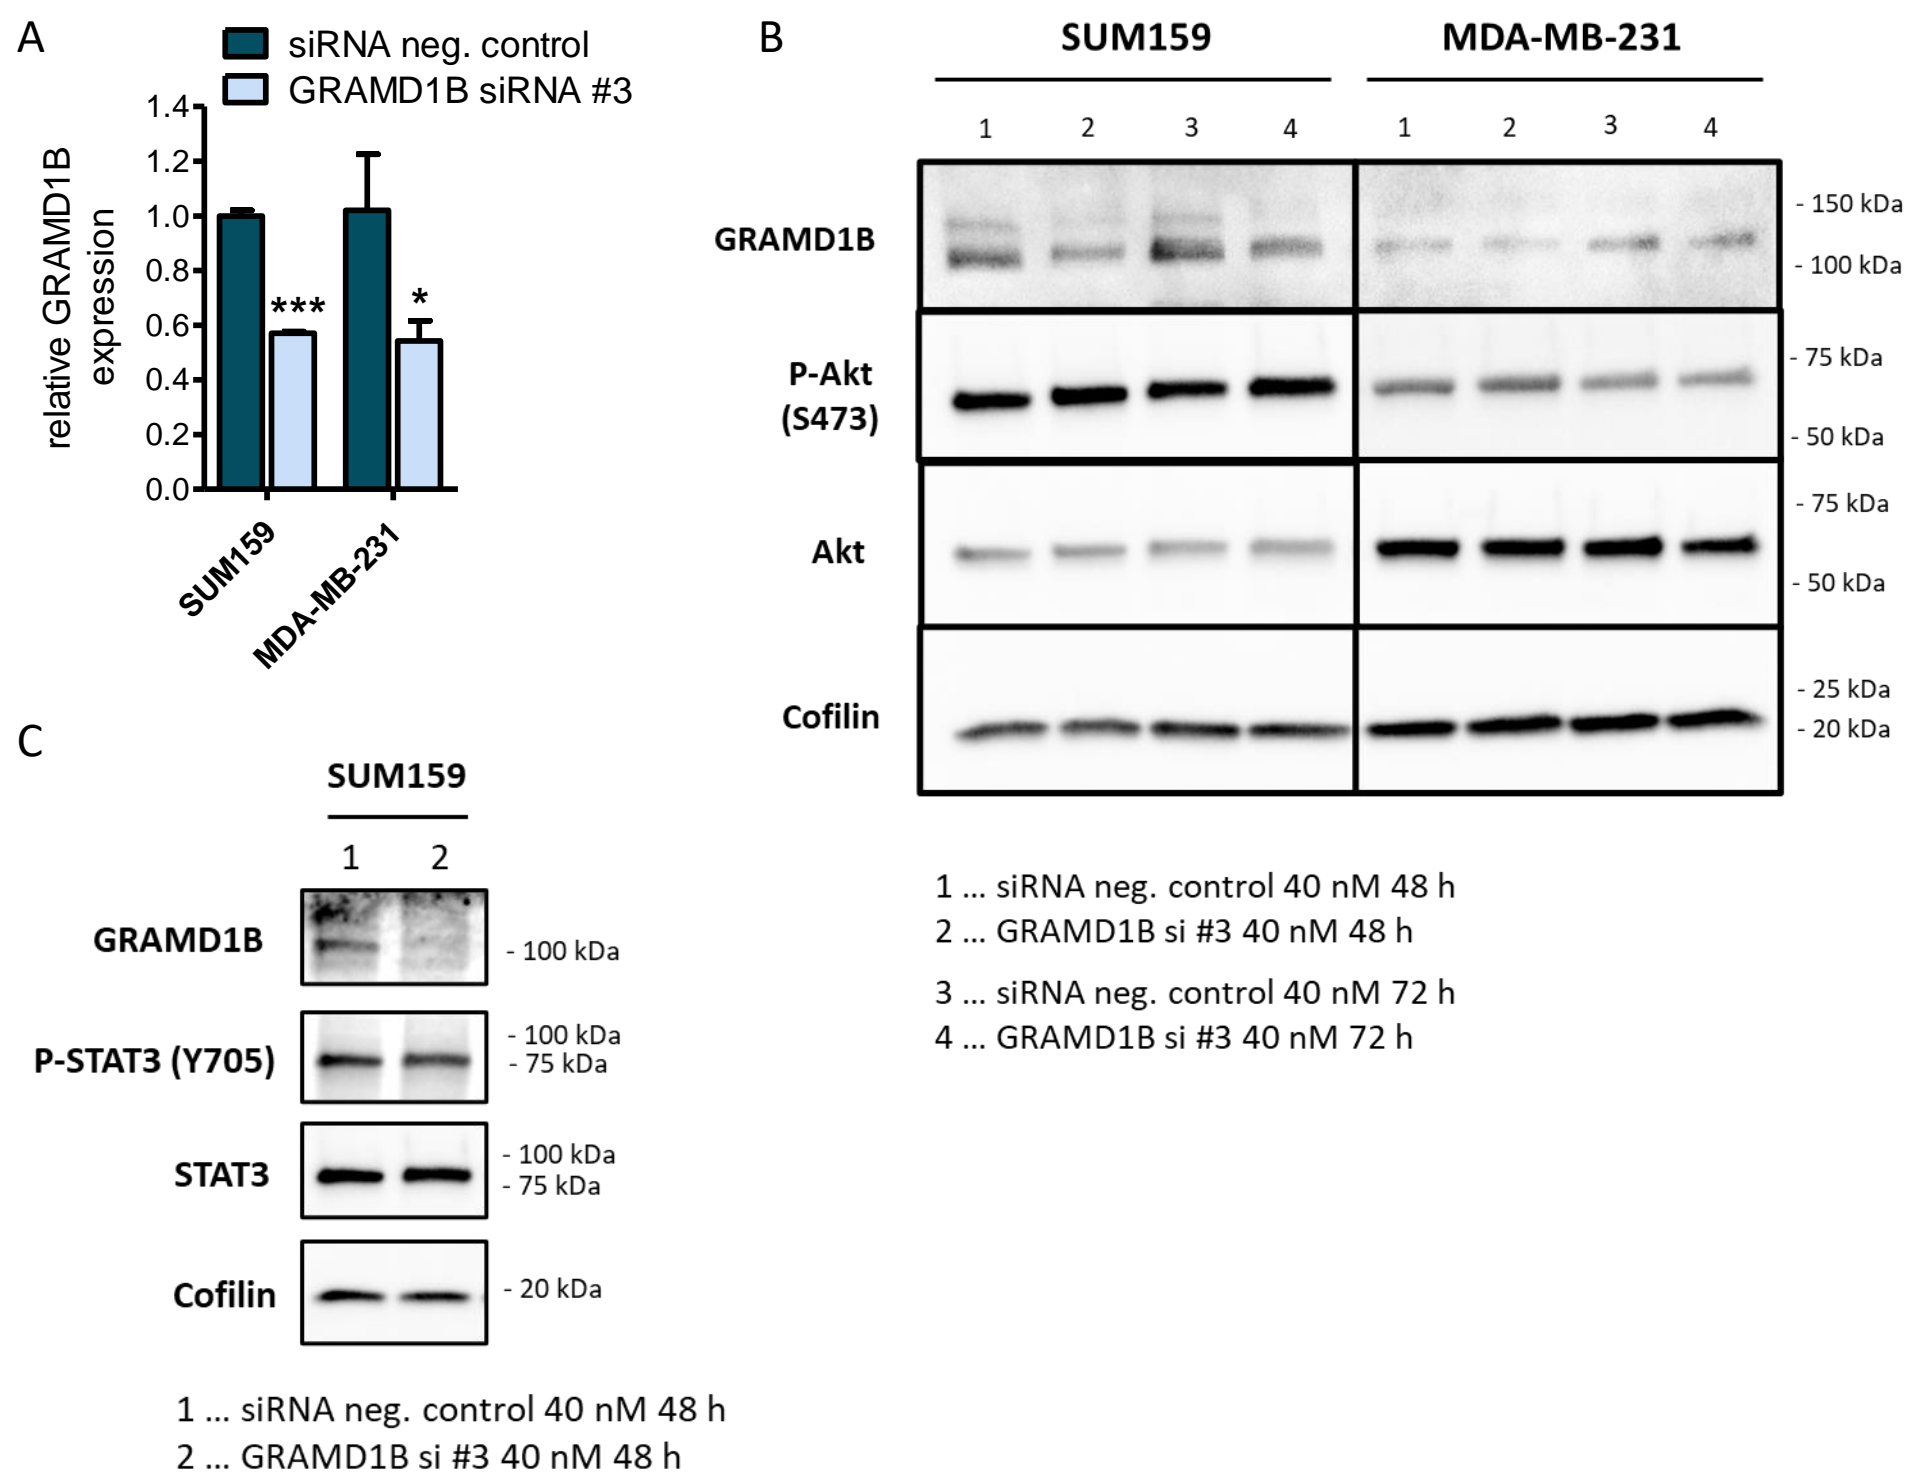

**Supplementary Figure S7. SiRNA-mediated knockdown of the GRAM Domain-Containing Protein 1B (GRAMD1B) in two TNBC cell lines and the impact on AKT and STAT3 phosphorylation. (A)** GRAMD1B knockdown-efficiency on the RNA level as determined by RT-qPCR 48 h after transduction (mean  $\pm$  SD; n = 3; \* $p \leq 0.05$ , \*\*\* $p \leq 0.001$ ). **(B)** GRAMD1B knockdown on the protein level 48 h and 72 h after transduction as determined by Western blotting. In addition, the impact on AKT phosphorylation was investigated. **(C)** The impact of GRAMD1B knockdown on STAT3 phosphorylation in SUM159 cells is shown in a representative Western Blot.

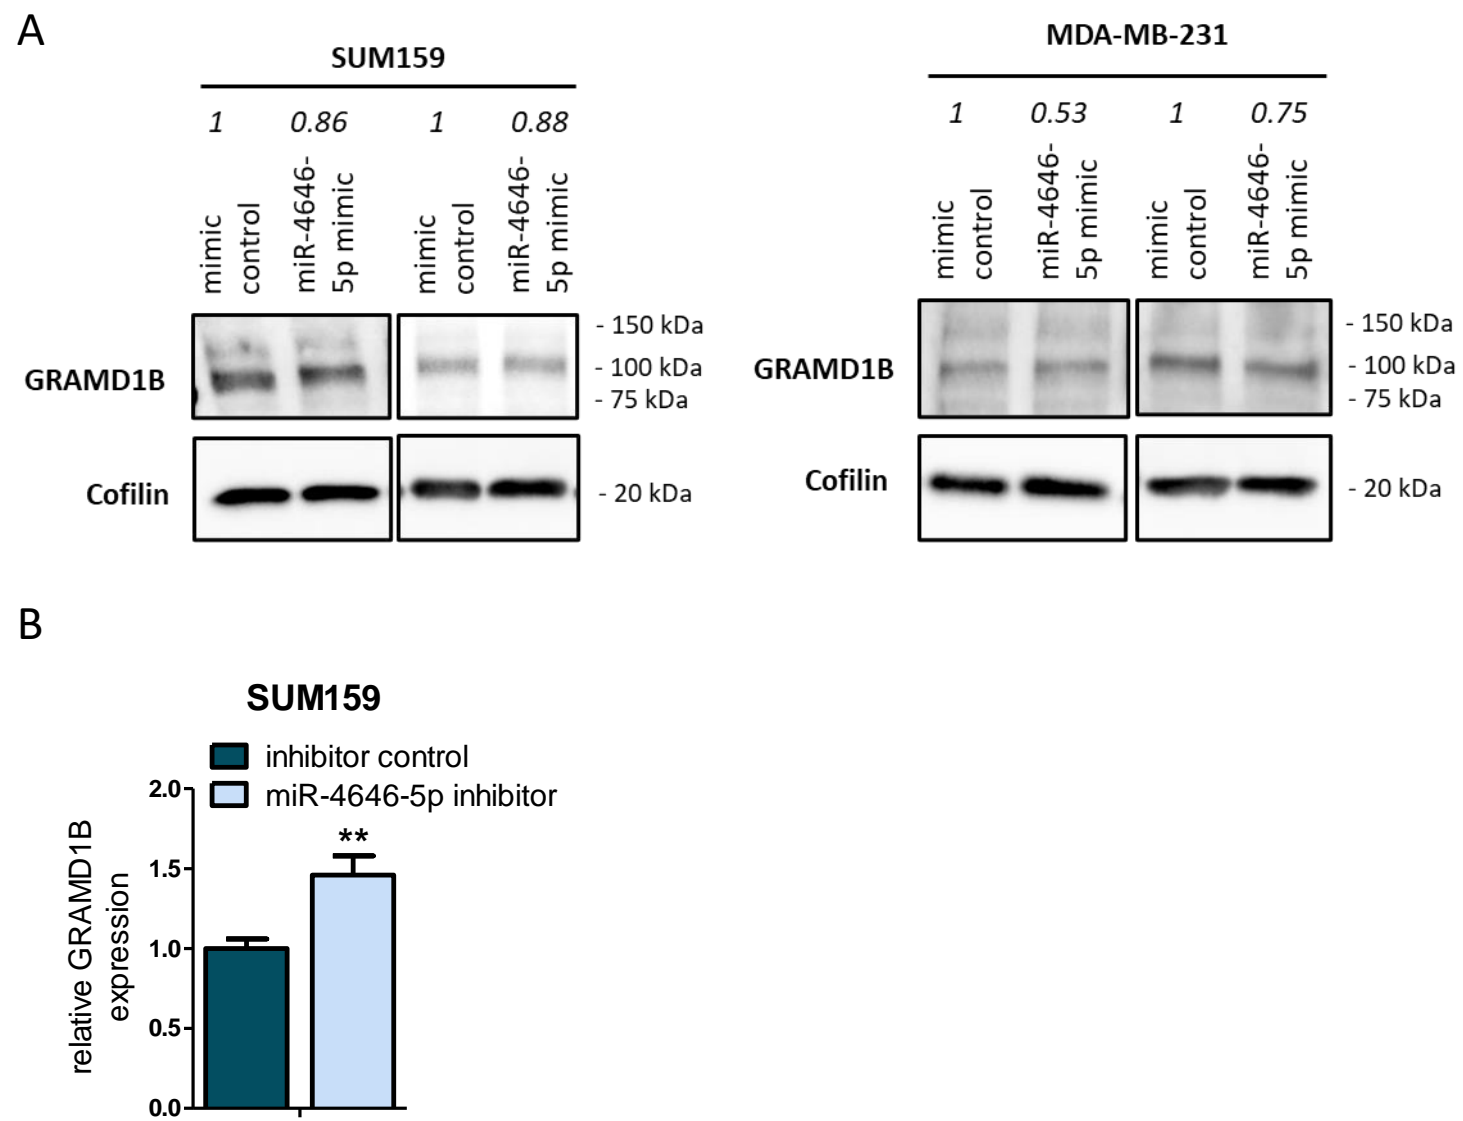

**Supplementary Figure S8. Effect of miR-4646-5p on GRAMD1B protein and expression. (A)** Impact of 48 h miR-4646-5p mimic transfection on GRAMD1B protein in SUM159 and MDA-MB-231 cells as determined by Western Blotting. Fold changes in signal intensity normalized to Cofilin and relative to the mimic controls are indicated. **(B)** Impact of 48 h miR-4646-5p inhibitor transfection on GRAMD1B expression in SUM159 cells as determined by RT-qPCR (mean  $\pm$  SD; n = 3; \*\*p  $\leq$  0.01).



Supplementary Table S1. Sequences of Primers

| Gene           | Primer orientation | Sequence (5'→3')               |
|----------------|--------------------|--------------------------------|
| <i>BAK</i>     | Forward            | TGC CCT CTG CTT CTG AGG A      |
|                | Reverse            | TTC CTG CTG ATG GCG GTA AA     |
| <i>BAX</i>     | Forward            | AGG GTG GTT GGG GGC TG         |
|                | Reverse            | AAA GTA GGA GAG GAG GCC GT     |
| <i>PUMA</i>    | Forward            | TGA AAT TTG GCA TGG GGT CTG    |
|                | Reverse            | CTC CCT GGG GCC ACA AAT        |
| <i>BAD</i>     | Forward            | TGT GGA CTC CTT TAA GAA GGG AC |
|                | Reverse            | CAC CAG GAC TGG AAG ACT CG     |
| <i>NOXA</i>    | Forward            | GGA GAT GCC TGG GAA GAA GG     |
|                | Reverse            | CAC TCG ACT TCC AGC TCT GC     |
| <i>FGF2</i>    | Forward            | GCTGTA CTGCAAAAACGGGG          |
|                | Reverse            | TAGCTTGATGTGAGGGTCGC           |
| <i>IL6</i>     | Forward            | ACCCCAATAAATATAGGACTGGA        |
|                | Reverse            | GAGAAGGCAACTGGACCGAA           |
| <i>NRP2</i>    | Forward            | GTACCAGATTGTGTTTCGAGGG         |
|                | Reverse            | TTCTCACCTGCAAAAGCCGA           |
| <i>GCSF</i>    | Forward            | TTGAGCCAACTCCATAGCGG           |
|                | Reverse            | TCCCAGTTCTTCCATCTGCTG          |
| <i>GRAMD1B</i> | Forward            | TCAAACATGTGGCAGGTTCC           |
|                | Reverse            | TAAGGATGACCAGCAGCACC           |
| <i>GAPDH</i>   | Forward            | AAGGTCGGAGTCAACGGATTT          |
|                | Reverse            | ACCAGAGTTAAAAGCAGCCCTG         |
| <i>U6</i>      | Forward            | CTCGCTTCGGCAGCACA              |
|                | Reverse            | AACGCTTCACGAATTTGCGT           |

Supplementary Table S2. Top 20 downregulated genes (ranked by fold change) after miR-4646-5p mimic transfection in SUM159 as determined by RNA-seq.

| Ensembl Gene ID | Gene Name         | Log2 fold change | Adjusted p-value |
|-----------------|-------------------|------------------|------------------|
| ENSG00000108342 | <i>CSF3</i>       | -1.99            | 5.285e-12        |
| ENSG00000136244 | <i>IL6</i>        | -1.79            | 7.017e-26        |
| ENSG00000115009 | <i>CCL20</i>      | -1.65            | 0.000274         |
| ENSG00000163568 | <i>AIM2</i>       | -1.54            | 0.001698         |
| ENSG0000023171  | <i>GRAMD1B</i>    | -1.43            | 1.808e-12        |
| ENSG00000269927 | <i>AC004817.3</i> | -1.39            | 0.008273         |
| ENSG00000163739 | <i>CXCL1</i>      | -1.32            | 2.192e-05        |
| ENSG00000273760 | <i>AC245041.1</i> | -1.31            | 5.391e-05        |

|                 |                   |       |           |
|-----------------|-------------------|-------|-----------|
| ENSG00000188766 | <i>SPRED3</i>     | -1.28 | 0.0009108 |
| ENSG00000236453 | <i>AC003092.1</i> | -1.27 | 0.0001296 |
| ENSG00000278266 | <i>AC079949.2</i> | -1.13 | 0.0408863 |
| ENSG00000196611 | <i>MMP1</i>       | -1.12 | 2.307e-13 |
| ENSG00000125538 | <i>IL1B</i>       | -1.09 | 0.0303237 |
| ENSG00000130021 | <i>PUDP</i>       | -1.08 | 4.005e-19 |
| ENSG00000164400 | <i>CSF2</i>       | -1.07 | 4.520e-06 |
| ENSG00000197249 | <i>SERPINA1</i>   | -1.07 | 0.0243591 |
| ENSG00000170345 | <i>FOS</i>        | -1.06 | 1.498e-06 |
| ENSG00000120738 | <i>EGR1</i>       | -1.06 | 4.520e-06 |
| ENSG00000232774 | <i>AL355916.1</i> | -1.06 | 6.163e-07 |
| ENSG00000280219 | <i>AC093908.1</i> | -1.06 | 0.0368737 |

Supplementary Table S3. Target binding sites for miR-4646-5p and its target GRAM domain-containing protein 1B (GRAMD1B) as predicted by the TargetScan algorithm.

| Binding site number | Position                                    | Predicted consequential pairing of target region (top) and miR-4646-5p (bottom) |                               | Context++ score percentile |
|---------------------|---------------------------------------------|---------------------------------------------------------------------------------|-------------------------------|----------------------------|
| 1                   | Position 1623-1629 of <i>GRAMD1B</i> 3' UTR | 5'                                                                              | ...AAGAAACCCCAUGUCCAGAU...    | 84                         |
|                     |                                             | 3'                                                                              | AGGGAGUCGAGGAGAAGGGUCA        |                            |
| 2                   | Position 1632-1638 of <i>GRAMD1B</i> 3' UTR | 5'                                                                              | ...CAGAUGUCCAGAUUCCAGAA...    | 86                         |
|                     |                                             | 3'                                                                              | AGGGAGUCGAGGAGAAGGGUCA        |                            |
| 3                   | Position 2097-2104 of <i>GRAMD1B</i> 3' UTR | 5'                                                                              | ...CAGAAGCCAAAACUAUCCAGAA...  | 97                         |
|                     |                                             | 3'                                                                              | AGGGAGUCGAGGAGAAGGGUCA        |                            |
| 4                   | Position 2299-2305 of <i>GRAMD1B</i> 3' UTR | 5'                                                                              | ...UACCUCUCAGGACCA-UUCCAGG... | 33                         |
|                     |                                             | 3'                                                                              | AGGGAGUCGAGGAGAAGGGUCA        |                            |
| 5                   | Position 3234-3240 of <i>GRAMD1B</i> 3' UTR | 5'                                                                              | ...CCCAGAGGCUGAAGCUUCCAGU...  | 33                         |
|                     |                                             | 3'                                                                              | AGGGAGUCGAGGAG-AAGGGUCA       |                            |
| 6                   | Position 3272-3278 of <i>GRAMD1B</i> 3' UTR | 5'                                                                              | ...AGGGCAGUGUCUGCAUCCAGG...   | 33                         |
|                     |                                             | 3'                                                                              | AGGGAGUCGAGGAGAAGGGUCA        |                            |
| 7                   | Position 3878-3884 of <i>GRAMD1B</i> 3' UTR | 5'                                                                              | ...UCUGGAUGCUUGUGGUCCAGAA...  | 78                         |
|                     |                                             | 3'                                                                              | AGGGAGUCGAGGAGAAGGGUCA        |                            |

**Supplementary Table S4. Gene Ontology (GO) enrichment analysis of genes that were significantly downregulated by miR-4646-5p in an RNA-seq analysis.** The table presents significantly enriched GO biological processes, the total number of genes annotated to these processes, how many of these genes were downregulated by miR-4646-5p (termed enriched gene number), the number of genes that would have been expected to be deregulated randomly, the fold enrichment, whether the enrichment is positive or negative (+/-), the raw p-values and the false discovery rate (FDR)-corrected p-values.

| <b>GO molecular function</b>                                      | <b>Total gene number</b> | <b>Enriched gene number</b> | <b>Expected gene number</b> | <b>Fold enrichment</b> | <b>+/-</b> | <b>raw p-value</b> | <b>FDR-corrected p-value</b> |
|-------------------------------------------------------------------|--------------------------|-----------------------------|-----------------------------|------------------------|------------|--------------------|------------------------------|
| transmembrane receptor protein tyrosine kinase activator activity | 14                       | 4                           | 0.21                        | 18.67                  | +          | 1.31E-04           | 4.34E-02                     |
| molecular function regulator activity                             | 2031                     | 53                          | 31.07                       | 1.71                   | +          | 1.35E-04           | 4.20E-02                     |
| epidermal growth factor receptor binding                          | 33                       | 6                           | 0.50                        | 11.88                  | +          | 2.40E-05           | 1.08E-02                     |
| growth factor receptor binding                                    | 141                      | 13                          | 2.16                        | 6.03                   | +          | 6.30E-07           | 6.27E-04                     |
| protein binding                                                   | 14448                    | 271                         | 221.05                      | 1.23                   | +          | 8.81E-11           | 4.39E-07                     |
| binding                                                           | 16594                    | 291                         | 253.88                      | 1.15                   | +          | 8.56E-09           | 2.13E-05                     |
| protein serine kinase activity                                    | 364                      | 19                          | 5.57                        | 3.41                   | +          | 6.31E-06           | 3.14E-03                     |
| protein kinase activity                                           | 583                      | 26                          | 8.92                        | 2.91                   | +          | 2.06E-06           | 1.47E-03                     |
| kinase activity                                                   | 765                      | 28                          | 11.70                       | 2.39                   | +          | 3.35E-05           | 1.39E-02                     |
| transferase activity, transferring phosphorus-containing groups   | 919                      | 31                          | 14.06                       | 2.20                   | +          | 5.42E-05           | 2.07E-02                     |
| phosphotransferase activity, alcohol group as acceptor            | 692                      | 28                          | 10.59                       | 2.64                   | +          | 4.96E-06           | 3.08E-03                     |
| cytokine receptor binding                                         | 272                      | 14                          | 4.16                        | 3.36                   | +          | 1.21E-04           | 4.30E-02                     |
| protein serine/threonine kinase activity                          | 433                      | 22                          | 6.62                        | 3.32                   | +          | 1.77E-06           | 1.47E-03                     |
| enzyme binding                                                    | 2103                     | 59                          | 32.17                       | 1.83                   | +          | 6.02E-06           | 3.33E-03                     |
